# Supplementary material for: Visfatin Affects the Transcriptome of Porcine Luteal Cells during Early Pregnancy
Source: MDPI journal article supplement (doi:10.3390/ijms25042339), 2024-02-16
Supplement: s1 [file s1]

**Table. Characteristics of primers and reactions conditions used in the study used to identify differentially expressed genes, long non-coding RNAs and alternatively spliced RNAs**

| Differential Gene Expression |                                                                         |              |               |                          |                |                                                                                                                                                            |
|------------------------------|-------------------------------------------------------------------------|--------------|---------------|--------------------------|----------------|------------------------------------------------------------------------------------------------------------------------------------------------------------|
| Gene Symbol                  | Primers sequences                                                       | Primers (nM) | Amplicon Size | GenBank accession number | References     | Reaction Conditions                                                                                                                                        |
| <b>IL17C</b>                 | F 5'-CTGGAAGCTGACACTCACG-3'<br>R 5'-GGTAGCGGTTCTCATCTGTG-3'             | 400          | 155 bp        | XM_021220807.2           | [115]<br>[116] | activation at 95°C - 10 min,<br>followed by 40 cycles of<br>denaturation at 95°C - 15 s,<br>annealing at 60°C for - 1 min<br>elongation - 72°C for - 1 min |
| <b>CYP2C49</b>               | F 5'-<br>TCTCAACAGGAAAACGAATTTGTG-3'<br>R 5'-TATGGCTGAACCCACTTAAAATG-3' | 200          | 153 bp        | XM_013983597.2           | [117]          |                                                                                                                                                            |
| <b>IRS4</b>                  | F 5'-CCGACACCTCATTGCTCTTTTC-3'<br>R 5'-TTTCCTGCTCCGACTCGTTCTC-3'        | 200          | 73 bp         | XM_006724713.4           | [118]          |                                                                                                                                                            |
| <b>CCNA1</b>                 | F 5'- GCGCCAAGGCTGGAATCTAT-3'<br>R 5'- CCTCAGTCTCCACAGGCTAC-3'          | 200          | 196 bp        | XM_005668339.3           | [119]          |                                                                                                                                                            |
| <b>NMUR2</b>                 | F 5'-CTCTGTTCTCTTCTCTCTGC-3'<br>R 5'- GCTTGATGACTGTACAGGTA-3'           | 200          | 107 bp        | XM_003134131.3           | [120]          |                                                                                                                                                            |
| <b>OCLN</b>                  | F 5'- CAGTGGTAACTTGGAGGCGT -3'<br>R 5'- CCGTCGTGTAGTCTGTCTCG -3'        | 400          | 104 bp        | NM_001163647.2           | [121]          | activation at 95°C - 10 min,<br>followed by 40 cycles of<br>denaturation at 95°C - 15 s,<br>annealing at 57°C for - 1 min<br>elongation - 72°C for - 1 min |

|               |                                                                               |     |                          |                |       |                                                                                                                                                            |
|---------------|-------------------------------------------------------------------------------|-----|--------------------------|----------------|-------|------------------------------------------------------------------------------------------------------------------------------------------------------------|
| <b>HCRT1</b>  | F 5'-ACCGCTGGTATGCCATCTACCAC-3'<br>R 5'-ATAAGGTCATCTGCCAGCGTTCA-3'            | 400 | 27-49 (F)<br>208-232 (R) | AF097995       | [71]  | activation at 95°C - 10 min,<br>followed by 40 cycles of<br>denaturation at 95°C - 15 s,<br>annealing at 59°C for - 1 min<br>elongation - 72°C for - 1 min |
| <b>CMLKR1</b> | F 5'-GGACTACCACTGGGTGTTTCG-3'<br>R 5'-GCCATGTAAGCCAGTCGGA-3'                  | 400 | 174 bp                   | EU660866       | [63]  |                                                                                                                                                            |
| <b>ACTB</b>   | F 5'-<br>ACATCAAGGAGAAGCTCTGCTACG-3'<br>R 5'-<br>GAGGGGCGATGATCTTGATCTTCA-3'  | 200 | 366 bp                   | U07786         | [122] |                                                                                                                                                            |
| <b>GAPDH</b>  | F 5'-<br>CCTTCATTGACCTCCACTACATGGT-3'<br>R 5'-<br>CCACAACATACGTAGCACCACGAT-3' | 200 | 183 bp                   | NM_001206359.1 | [123] |                                                                                                                                                            |

#### Differential Alternative Splicing Events

| Gene          | Primers sequences                                                 | Primers (nM) | Amplicon Size                       | GenBank accession number | References | Reaction Conditions                                                                                                                                        |
|---------------|-------------------------------------------------------------------|--------------|-------------------------------------|--------------------------|------------|------------------------------------------------------------------------------------------------------------------------------------------------------------|
| Symbole       |                                                                   |              |                                     |                          |            |                                                                                                                                                            |
| <b>FBXO15</b> | F: 5'-TTCTACTTGGATGCTGTGACCT-3'<br>R: 5'-GTCCACCATGATTGGCTGTG-3'  | 400          | Inclusion<br>598<br>Skipping<br>387 | XM_005659828.3           | herein     | activation at 95°C - 10 min,<br>followed by 40 cycles of<br>denaturation at 95°C - 15 s,<br>annealing at 58°C for - 1 min<br>elongation - 72°C for - 1 min |
| <b>CPSF7</b>  | F: 5'-GCATCTTTCTTACCTTGTGCGTT-3'<br>R: 5'-TTTCAGAGGCTACCACCACC-3' | 400          | Inclusion<br>460<br>Skipping<br>306 | XM_021082934.1           |            | activation at 95°C - 10 min,<br>followed by 40 cycles of<br>denaturation at 95°C - 15 s,                                                                   |

|       |                                                                   |     |                  |                |                                                                 |
|-------|-------------------------------------------------------------------|-----|------------------|----------------|-----------------------------------------------------------------|
| PIGN  | F: 5'- AGCAGCTCTGGTCAGGTAAG-3'<br>R: 5'- TGATGGTCGGTGAGCATGTC-3'  | 400 | Inclusion<br>884 | XM_021099768.1 | annealing at 60°C for - 1 min,<br>elongation - 72°C for - 1 min |
|       |                                                                   |     | Skipping<br>761  |                |                                                                 |
| RECK  | F: 5'- AACCAAATGTGCCGTGATGT-3'<br>R: 5'- AGTTTGTGTGATGGCCTGCA-3'  | 400 | Inclusion<br>352 | XM_021065979.1 |                                                                 |
|       |                                                                   |     | Skipping<br>292  |                |                                                                 |
| PAM   | F: 5'- ATGGGACCGTGTTTGTGGA-3'<br>R: 5'- GTCTGTGTGGGACTGTACACAT-3' | 400 | Inclusion<br>678 | XM_021084569.1 |                                                                 |
|       |                                                                   |     | Skipping<br>292  |                |                                                                 |
| CDC45 | F: 5'- TGTCTAGGACCTGAGCGACA-3'<br>R: 5'- TGATGTGGTCTTTGCCACCAT-3' | 400 | Inclusion<br>551 | XM_021074124.1 |                                                                 |
|       |                                                                   |     | Skipping<br>415  |                |                                                                 |

#### lncRNA

| Gene               | Primers sequences                                                  | Primers<br>(nM) | Amplicon<br>Size | GenBank<br>accession<br>number | References | Reaction Conditions                                                                                                                                         |
|--------------------|--------------------------------------------------------------------|-----------------|------------------|--------------------------------|------------|-------------------------------------------------------------------------------------------------------------------------------------------------------------|
| Symbole            |                                                                    |                 |                  |                                |            |                                                                                                                                                             |
| <b>CCBE1</b>       | F: 5'- TGCTGGGATGTATTGGCGATT-3'<br>R: 5'- GCAACCGTCTGTCTTTGCTG -3' | 300             | 140              | AK395352.1                     | herein     | activation at 95°C - 10 min,<br>followed by 40 cycles of<br>denaturation at 95°C - 15 s,<br>annealing at 59°C for - 1 min,<br>elongation - 72°C for - 1 min |
| <b>CCNB1IP1</b>    | F: 5'- TATGCATGGGTCAGTGCCTG -3'<br>R: 5'- CCGCACAGAACTCAGTCCAT -3' | 300             | 142              | XR_002345959.1                 |            |                                                                                                                                                             |
| <b>MSTRG.515.2</b> | F: 5'- AGCAGTTCAGTTTGGGCAGT -3'<br>R: 5'- GTAGAGTGGGCACATGGCTT -3' | 300             | 135              | XM_003121722.6                 |            |                                                                                                                                                             |

|                      |                                                                 |     |     |                |  |  |
|----------------------|-----------------------------------------------------------------|-----|-----|----------------|--|--|
| <b>MSTRG.10127.1</b> | F: 5'-CATGTCCCTTGGGAAGGTCT-3'<br>R: 5'-GAGGTGAGTTCCCAGAGAACG-3' | 300 | 150 | XR_002345958.1 |  |  |
|----------------------|-----------------------------------------------------------------|-----|-----|----------------|--|--|

**ADTRP** - androgen dependent TFPI regulating protein; **IL17C** - interleukin 17C; **CYP2C49** - cytochrome P450 2C49; **LRP15** - leucine rich repeat containing 3B; **IRS4** - insulin receptor substrate 4; **CCNA1** - cyclin a1; **NMUR2** - neuromedin U receptor 2; **OCN** - occludin; **HCRT1** - hypocretin receptor 1; **CMLK1** - chemerin chemokine-like receptor 1; **ACTB** - actin beta; **GAPDH** - glyceraldehyde-3-phosphate dehydrogenase; **FBXO15** - **CPSF7** - cleavage and polyadenylation specific factor 7; **PIGN** - phosphatidylinositol glycan anchor biosynthesis class N; **RECK** - reversion inducing cysteine rich protein with kazal motifs; **PAM** - peptidylglycine alpha-amidating monooxygenase; **CDC45** - cell division cycle 45 **CCBE1** - collagen and calcium binding epidermal growth factor domains 1, **CCNB1IP1** - cyclin B1 interacting protein 1, F – forward; R - reverse

## Reference

115. Vella, G.; Ritzmann, F.; Wolf, L.; Kamyschnikov, A.; Stodden, H.; Herr, C.; Slevogt, H.; Bals, R.; Beisswenger, C. IL-17C Contributes to NTHi-Induced Inflammation and Lung Damage in Experimental COPD and Is Present in Sputum during Acute Exacerbations. *PLoS ONE* **2021**, *16*, <https://doi.org/10.1371/JOURNAL.PONE.0243484>.
116. Yamaguchi, S.; Nambu, A.; Numata, T.; Yoshizaki, T.; Narushima, S.; Shimura, E.; Hiraishi, Y.; Arae, K.; Morita, H.; Matsumoto, K.; et al. The Roles of IL-17C in T Cell-Dependent and -Independent Inflammatory Diseases. *Sci. Rep.* **2018**, *8*, 15750. <https://doi.org/10.1038/s41598-018-34054-x>.
117. Ramayo-Caldas, Y.; Mach, N.; Esteve-Codina, A.; Corominas, J.; Castelló, A.; Ballester, M.; Estellé, J.; Ibáñez-Escriche, N.; Fernández, A.I.; Pérez-Enciso, M.; et al. Liver Transcriptome Profile in Pigs with Extreme Phenotypes of Intramuscular Fatty Acid Composition. *BMC Genom.* **2012**, *13*, 547. <https://doi.org/10.1186/1471-2164-13-547/FIGURES/6>.
118. Cantarini, M.C.; De La Monte, S.M.; Pang, M.; Tong, M.; D'Errico, A.; Trevisani, F.; Wands, J.R. Aspartyl-Asparagyl  $\beta$  Hydroxylase over-Expression in Human Hepatoma Is Linked to Activation of Insulin-like Growth Factor and Notch Signaling Mechanisms. *Hepatology* **2006**, *44*, 446–457. <https://doi.org/10.1002/HEP.21272>.
119. Zhou, X.; He, Y.; Li, N.; Bai, G.; Pan, X.; Zhang, Z.; Zhang, H.; Li, J.; Yuan, X. DNA Methylation Mediated RSPO2 to Promote Follicular Development in Mammals. *Cell Death Dis.* **2021**, *12*, 653. <https://doi.org/10.1038/s41419-021-03941-z>.
120. Li, X.; Niu, M.; Su, J.; Ma, Z.; Jin, M.; Qiao, W.; Zhang, Y.; Feng, Y.; An, N.; Hou, Y.; et al. Cloning and Expression Patterns of Neuromedin U and Its Receptors in Pigs. *Neuropeptides* **2017**, *64*, 47–60. <https://doi.org/10.1016/J.NPEP.2017.04.003>.
121. Choi, K.H.; Park, J.K.; Son, D.; Hwang, J.Y.; Lee, D.K.; Ka, H.; Park, J.; Lee, C.K. Reactivation of Endogenous Genes and Epigenetic Remodeling Are Barriers for Generating Transgene-Free Induced Pluripotent Stem Cells in Pig. *PLoS ONE* **2016**, *11*, <https://doi.org/10.1371/JOURNAL.PONE.0158046>.
122. Spagnuolo-Weaver, M.; Fuerst, R.; Campbell, S.T.; Meehan, B.M.; McNeilly, F.; Adair, B.; Allan, G. A Fluorimeter-Based RT-PCR Method for the Detection and Quantitation of Porcine Cytokines. *J. Immunol. Methods* **1999**, *230*, 19–27. [https://doi.org/10.1016/S0022-1759\(99\)00114-3](https://doi.org/10.1016/S0022-1759(99)00114-3).
123. Bogacka, I.; Przała, J.; Siawrys, G.; Kaminski, T.; Smolinska, N. The Expression of Short Form of Leptin Receptor Gene during Early Pregnancy in the Pig Examined by Quantitative Real Time RT-PCR. *J. Physiol. Pharmacol.* **2006**, *57*, 479–489.
